# Supplementary material for: The role of glutathione in the metabolism of diphenylarsinic acid in rats
Source: Royal Society of Chemistry journal article supplement (doi:10.1039/c2mt20228j), 2013-01-01
Supplement: c2mt20228j.pdf [file c2mt20228j.pdf]

## The role of glutathione in the metabolism of diphenylarsinic acid in rats

Yayoi Kobayashi<sup>a\*</sup> and Seishiro Hirano<sup>b</sup>

<sup>a</sup> Center for Environmental Health Sciences and <sup>b</sup> Research Center for Environmental Risk, National Institute for Environmental Studies, 16-2 Onogawa, Tsukuba, Ibaraki 305-8506, Japan

\*All correspondence should be addressed to: Yayoi Kobayashi, Ph.D.  
Environmental Health Sciences Division, National Institute for Environmental Studies  
16-2 Onogawa, Tsukuba, Ibaraki 305-8506, Japan  
Tel: +81-29-850-2893; Fax: +81-29-850-2893  
E-mail: kobayashi.yayoi@nies.go.jp.

### (a) Authentic arsenic species

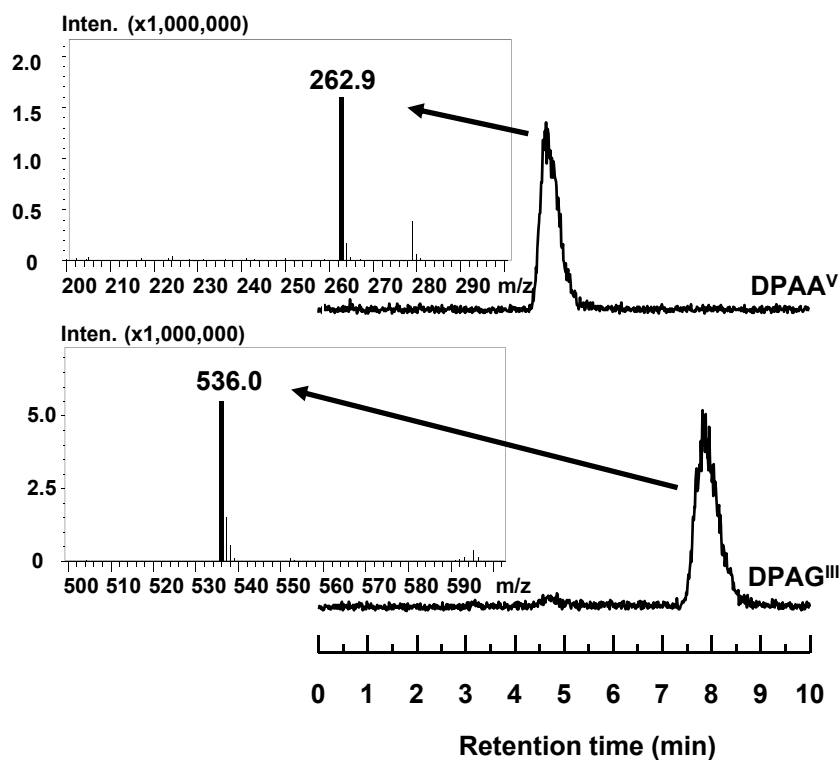

### (b) Biliary arsenic metabolites

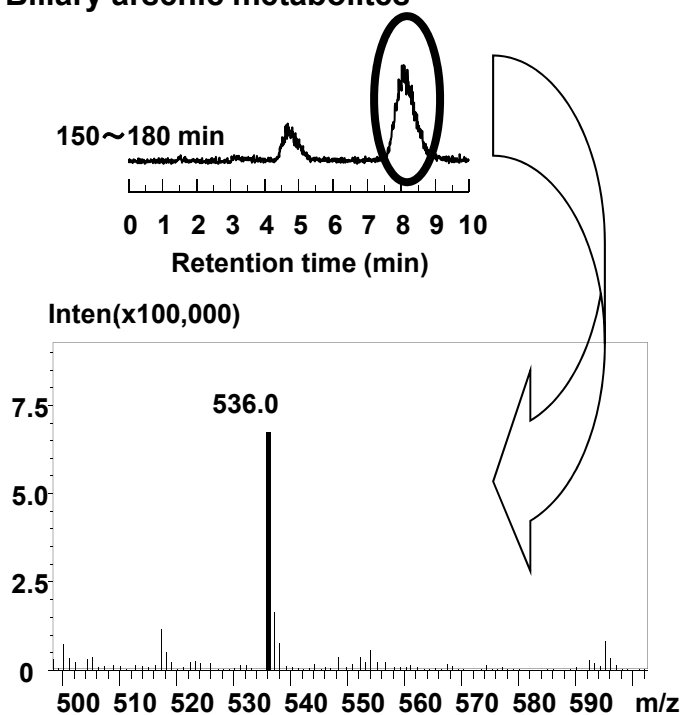

Fig. S-1. Elution profiles and mass spectra by HPLC-ESI-MS of (a) authentic arsenicals and (b) biliary arsenic metabolites. DPAA<sup>V</sup> and DPAG<sup>III</sup> complex in bile were applied to the reversed phase column (Inertsil® C8-3 ; 150 mm × 2.1 mm; GL Science, Tokyo, Japan). The column effluent was analyzed by monitoring positive ions by electro spray ionization (ESI) coupled to a mass spectrometer. Selective ion monitoring (SIM) was used to identify DPAA<sup>V</sup> ( $m/z$  262.9 [M+H]<sup>+</sup>) and DPAG<sup>III</sup> ( $m/z$  536.0 [M+H]<sup>+</sup>).

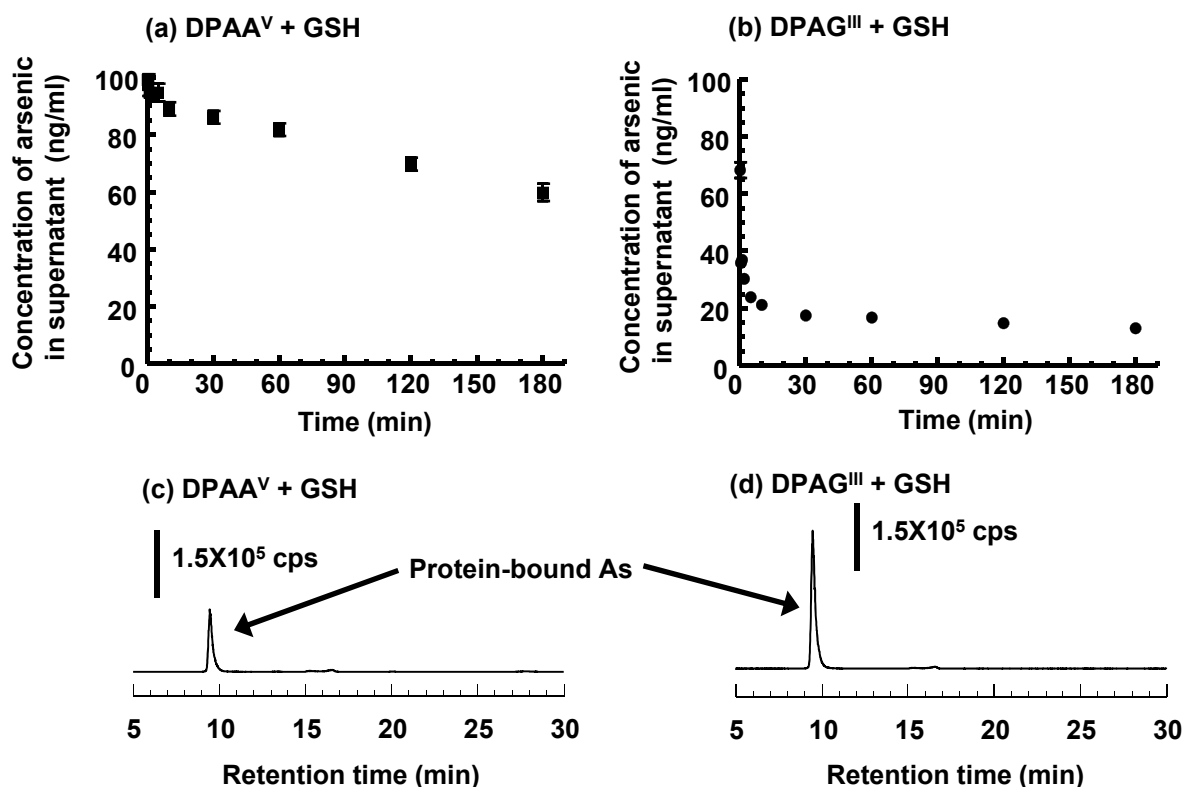

Fig. S-2. Time-course of changes in accumulation of (a) DPAAV and (b) DPAGIII in erythrocytes and (c and d) elution profiles of arsenic in 10% erythrocytes lysate. The erythrocytes were washed three times with 50 mM Tris-buffered saline (TBS) (pH 7.4, 25 °C), and then a 10% erythrocyte suspension was prepared for the study of uptake of DPAA into the erythrocytes. (a and c) DPAAV (final 500 ng As/ml) and GSH (final 5 mM) or (b and d) DPAGIII (final 500 ng As/ml) and GSH (final 5 mM) were added to the 10% erythrocyte suspension and incubated at 37 °C for up to 3 h. The erythrocytes and supernatant were separated by centrifugation (8,000 g, 10 sec). Each supernatant was digested with HNO<sub>3</sub> and H<sub>2</sub>O<sub>2</sub>, and the concentration of arsenic in the sample was determined by ICP-MS. Values are mean ± SD (n=3). The erythrocytes were washed three times with TBS, resuspended to 10% in TBS, and the erythrocytes in the suspension were lysed by freezing and thawing after completion of the reaction. The resulting lysate was centrifuged at 15,000 g for 10 min to prepare a 10% erythrocyte lysate fraction, and the lysate fractions were applied to the gel-filtration column for determination of the chemical forms of arsenic by HPLC-ICP-MS.
